# Supplementary material
Source: ML conference proceedings conference paper supplement (https://openaccess.thecvf.com/content/ICCV2021/html/Verelst_BlockCopy_High-Resolution_Video_ICCV_2021_paper.html)
Supplement: Supplementary file 1 [file Verelst_BlockCopy_High-Resolution_Video_ICCV_2021_supplemental.zip]

Archive with 4 entries (4 files):
- blockcopy_supplemental.pdf
- __MACOSX/._blockcopy_supplemental.pdf
- blockcopy_video.mp4
- __MACOSX/._blockcopy_video.mp4
