# Supplementary material
Source: ML conference proceedings conference paper supplement (https://openaccess.thecvf.com/content/ICCV2021/html/Verelst_BlockCopy_High-Resolution_Video_ICCV_2021_paper.html)
Supplement: Supplementary file 1 [file Verelst_BlockCopy_High-Resolution_Video_ICCV_2021_supplemental.zip › blockcopy_supplemental.pdf]

# BlockCopy: High-Resolution Video Processing with Block-Sparse Feature Propagation and Online Policies

## Supplementary material

### 1. Introduction

The supplemental material contains

- a video visualizing the input/output, policy decisions, frame state and information gain, as shown in Figure 2 of the manuscript,
- the complete derivation of the reinforcement learning loss function given in Section 3.5 of the manuscript,
- the full numeric results of Section 4.3 of the manuscript.

### 2. Reinforcement learning

This section gives the full derivation of the reinforcement loss (Eq. 7 in the manuscript). The dependence on the time step  $t$  is omitted for simplicity of notation.

The policy predicts actions  $\mathcal{A}$  with the goal of maximizing the expected reward, within the computational budget constraint, based on the input state  $\mathcal{S}_t$ . Actions  $\mathcal{A}$  are given by the actions of the individual blocks  $b$  in the image:

$$\mathcal{A}_t = [a_1, \dots, a_b, \dots, a_B] \in \{0, 1\}^B.$$

With  $a_b = 1$  resulting in execution of block  $b$ .

Actions should maximize the reward per image, with the objective given by

$$\max \mathcal{J}(\theta) = \max \mathbb{E}_{\mathcal{A} \sim \pi_\theta} [\mathcal{R}(\mathcal{A})]. \quad (1)$$

We define the total reward as the sum of the block rewards in the image:

$$\mathcal{R}(\mathcal{A}) = \sum_{b=1}^B [\mathcal{R}_b(a_b)]. \quad (2)$$

Assuming that block actions are independent, the objective to be maximized is then given by

$$\max \mathcal{J}(\theta) = \max \sum_{b=1}^B \left( \mathbb{E}_{a_b \sim \pi_{b,\theta}} [\mathcal{R}_b(a_b)] \right) \quad (3)$$

with  $\mathcal{R}_b$  the reward based on the Information Gain  $IG$  as described in Section 3.5 in the manuscript. The policy network's parameters  $\theta$  can then be updated using gradient ascent with learning rate  $\alpha$ :

$$\theta \leftarrow \theta + \alpha \nabla_\theta [\mathcal{J}(\theta)]. \quad (4)$$

The gradient of the objective is given by:

$$\nabla_\theta \mathcal{J}(\theta) = \nabla_\theta \sum_b^B \left( \mathbb{E}_{a_b \sim \pi_{b,\theta}} [\mathcal{R}_b(a_b)] \right). \quad (5)$$

The expected value over  $a_b$  is the sum of all possible values of  $a_b$ , weighted by the probability  $\pi_{b,\theta}(a_b | \mathcal{S}_t)$ :

$$\nabla_{\theta} \mathcal{J}(\theta) = \nabla_{\theta} \sum_b \sum_{a_b=\{0,1\}} \pi_{b,\theta}(a_b | \mathcal{S}_t) \mathcal{R}_b(a_b). \quad (6)$$

Using the sum-rule

$$\nabla_{\theta} \mathcal{J}(\theta) = \sum_b \sum_{a_b=\{0,1\}} \nabla_{\theta} \pi_{b,\theta}(a_b | \mathcal{S}_t) \mathcal{R}_b(a_b) \quad (7)$$

and the log-derivative trick

$$\nabla_{\theta} \mathcal{J}(\theta) = \sum_b \sum_{a_b=\{0,1\}} \pi_{b,\theta}(a_b | \mathcal{S}_t) \frac{\nabla_{\theta} \pi_{b,\theta}(a_b | \mathcal{S}_t)}{\pi_{b,\theta}(a_b | \mathcal{S}_t)} \mathcal{R}_b(a_b) \quad (8)$$

results in

$$\nabla_{\theta} \mathcal{J}(\theta) = \sum_b \sum_{a_b=\{0,1\}} \pi_{b,\theta}(a_b | \mathcal{S}_t) \nabla_{\theta} \log \pi_{b,\theta}(a_b | \mathcal{S}_t) \mathcal{R}_b(a_b). \quad (9)$$

The sum over  $a_b$  can be replaced by the expectation:

$$\nabla_{\theta} \mathcal{J}(\theta) = \sum_b \left( \mathbb{E}_{a_b \sim \pi_{b,\theta}} \left[ \nabla_{\theta} \log \pi_{b,\theta}(a_b | \mathcal{S}_t) \mathcal{R}_b(a_b) \right] \right). \quad (10)$$

In practice, the expectation is approximated using Monte-Carlo sampling. Maximizing the objective is equivalent to minimizing the loss function

$$\mathcal{L} = - \sum_{b=1}^B (\mathcal{R}_b(a_b) \log \pi_{b,\theta}(a_b | \mathcal{S}_t)) . \quad (11)$$

### 3. Semantic segmentation full results

The numeric results of Figure 7 in the manuscript can be found in Table 1. Inference times are as reported in the respective references, while also a normalized inference time is calculated based on the GPU power, in order to be equivalent of an Nvidia GTX 1080 Ti. The scaling factors to normalize inference time are given in Table 2.

### References

- [1] Mehwish Awan and Jitae Shin. Online keyframe selection scheme for semantic video segmentation. In *2020 IEEE International Conference on Consumer Electronics-Asia (ICCE-Asia)*, pages 1–5. IEEE, 2020. 3
- [2] Mehwish Awan and Jitae Shin. Semantic video segmentation with dense-and-dual warping spatial features. In *2020 International Conference on Artificial Intelligence in Information and Communication (ICAIIIC)*, pages 129–132. IEEE, 2020. 3
- [3] Raghudeep Gadde, Varun Jampani, and Peter V Gehler. Semantic video cnns through representation warping. In *Proceedings of the IEEE International Conference on Computer Vision*, pages 4453–4462, 2017. 3
- [4] Samvit Jain and Joseph E Gonzalez. Fast semantic segmentation on video using block motion-based feature interpolation. In *Proceedings of the European Conference on Computer Vision (ECCV) Workshops*, pages 0–0, 2018. 3
- [5] Samvit Jain, Xin Wang, and Joseph E Gonzalez. Accel: A corrective fusion network for efficient semantic segmentation on video. In *Proceedings of the IEEE/CVF Conference on Computer Vision and Pattern Recognition*, pages 8866–8875, 2019. 3
- [6] Yule Li, Jianping Shi, and Dahua Lin. Low-latency video semantic segmentation. In *Proceedings of the IEEE Conference on Computer Vision and Pattern Recognition*, pages 5997–6005, 2018. 3
- [7] David Nilsson and Cristian Sminchisescu. Semantic video segmentation by gated recurrent flow propagation. In *Proceedings of the IEEE conference on computer vision and pattern recognition*, pages 6819–6828, 2018. 3
- [8] Evan Shelhamer, Kate Rakelly, Judy Hoffman, and Trevor Darrell. Clockwork convnets for video semantic segmentation. In *European Conference on Computer Vision*, pages 852–868. Springer, 2016. 3
- [9] Yu-Syuan Xu, Tsu-Jui Fu, Hsuan-Kung Yang, and Chun-Yi Lee. Dynamic video segmentation network. In *Proceedings of the IEEE Conference on Computer Vision and Pattern Recognition*, pages 6556–6565, 2018. 3
- [10] Xizhou Zhu, Yuwen Xiong, Jifeng Dai, Lu Yuan, and Yichen Wei. Deep feature flow for video recognition. In *Proceedings of the IEEE conference on Computer Vision and Pattern Recognition*, pages 2349–2358, 2017. 3

Table 1: Results on CityScapes validation set and comparison to other methods for video semantic segmentation. Normalized inference time is scaled by GPU power, to be equivalent to an Nvidia GTX 1080 Ti GPU.

| method                     | GPU       | baseline         |        |                |                       | accelerated |                |                       |
|----------------------------|-----------|------------------|--------|----------------|-----------------------|-------------|----------------|-----------------------|
|                            |           | architecture     | mIoU   | inference time | inference time (norm) | mIoU        | inference time | inference time (norm) |
| BlockCopy+DeepLab (t=0.3)  | 1080 Ti   | DeepLabV3+ RN101 | 76.2%  | 204 ms         | 204ms                 | 69.8 %      | 132 ms         | 132 ms                |
| BlockCopy+DeepLab (t=0.5)  |           |                  |        |                |                       | 74.9 %      | 156 ms         | 156 ms                |
| BlockCopy+DeepLab (t=0.7)  |           |                  |        |                |                       | 75.8 %      | 175 ms         | 175 ms                |
| BlockCopy+SwiftNet (t=0.3) | 1080 Ti   | SwiftNet RN50    | 77.7%  | 90 ms          | 90ms                  | 70.8 %      | 50 ms          | 50 ms                 |
| BlockCopy+SwiftNet (t=0.5) |           |                  |        |                |                       | 76.4 %      | 63 ms          | 63 ms                 |
| BlockCopy+SwiftNet (t=0.7) |           |                  |        |                |                       | 77.4 %      | 77 ms          | 77 ms                 |
| Accel-18                   | Tesla K80 | DeepLab-RN101    | 75.2%  | 740 ms         |                       | 72.1 %      | 440 ms         | 159 ms                |
| Accel-34                   |           |                  |        |                |                       | 72.4 %      | 530 ms         | 192 ms                |
| Accel-50                   |           |                  |        |                |                       | 74.2 %      | 670 ms         | 243 ms                |
| Accel-101                  |           |                  |        |                |                       | 75.5 %      | 870 ms         | 315 ms                |
| LLVSS                      | unknown   | N.A.             | -      | -              | -                     | 76.9 %      | 171 ms         | -                     |
| LLVSS-LL                   |           |                  |        |                |                       | 75.9 %      | 119 ms         | -                     |
| DVSNet-DeepLabV2           | 1080 Ti   | DeepLabV2        | 74.8 % | 555 ms         | 555 ms                | 70.3 %      | 120 ms         | 120 ms                |
| DVSNet-DeepLab-Fast        |           | DeepLab-Fast     | 73.5 % | 165 ms         | 165 ms                | 71.9 %      | 83 ms          | 83 ms                 |
| DVSNet-DeepLab-Fast        |           | DeepLab-Fast     | 73.5 % | 165 ms         | 165 ms                | 70.4 %      | 54 ms          | 54 ms                 |
| OKSS                       | Titan XP  | -                | -      | -              | -                     | 74.2 %      | 250 ms         | 233 ms                |
| Awan and Shin              | Titan XP  | DeepLabV3 RN50   | 74.9 % | 670 ms         | 623 ms                | 74.1 %      | 340 ms         | 316 ms                |
| DFF                        | Tesla K40 | -                | 71.1 % | 658 ms         | 292 ms                | 69.2 %      | 178 ms         | 79 ms                 |
| BMV-prop-mv                | unknown   | DeepLab          | 75.2%  | 770 ms         |                       | 67.5 %      | 178 ms         | -                     |
| BMV-prop-mv                |           |                  |        |                |                       | 71.2 %      | 290 ms         | -                     |
| ClockWork                  | unknown   | FCN              | -      | -              | -                     | 64.4 %      | 83 ms          | -                     |
| NetWarp                    | Titan X   | PSPNet-SSc       | 79.4 % | 3000 ms        | 1764 ms               | 80.6 %      | 3040 ms        | 1788 ms               |
| GRFP                       | Titan X   | -                | -      | -              | -                     | 69.4 %      | 1700 ms        | 1000 ms               |

Table 2: GPU performance and scaling factors

| GPU                | TFLOPS | factor |
|--------------------|--------|--------|
| Nvidia GTX 1080 Ti | 11.34  | x1.0   |
| Nvidia Titan XP    | 12.15  | x1.07  |
| Nvidia Titan X     | 6.691  | x0.60  |
| Nvidia Tesla K40   | 5.046  | x0.44  |
| Nvidia Tesla K80   | 4.113  | x0.36  |
